# Supplementary material for: High structural stability, reduced lattice-thermal conductivity, and elevated energy harvesting efficiency in a Lu 2 CoCrO 6
Source: Royal Society of Chemistry journal article supplement (doi:10.1039/d5ra07005h), 2025-01-01
Supplement: d5ra07005h1.pdf [file d5ra07005h1.pdf]

## Supporting Information

### High Structural Stability, Reduced Lattice-Thermal Conductivity, and Elevated Energy Harvesting Efficiency in a $\text{Lu}_2\text{CoCrO}_6$

Samia Shahzadi<sup>1</sup>, A. Elfasakhany<sup>2</sup>, and S. Nazir<sup>1\*</sup>

<sup>1</sup>*Department of Physics, University of Sargodha, 40100 Sargodha, Pakistan and*

<sup>2</sup>*Mechanical Engineering Department, College of Engineering, Taif University, Taif 21944, Saudi Arabia*

---

\* Electronic address: [safdar.nazir@uos.edu.pk](mailto:safdar.nazir@uos.edu.pk), Tel: +92-334-971-9060

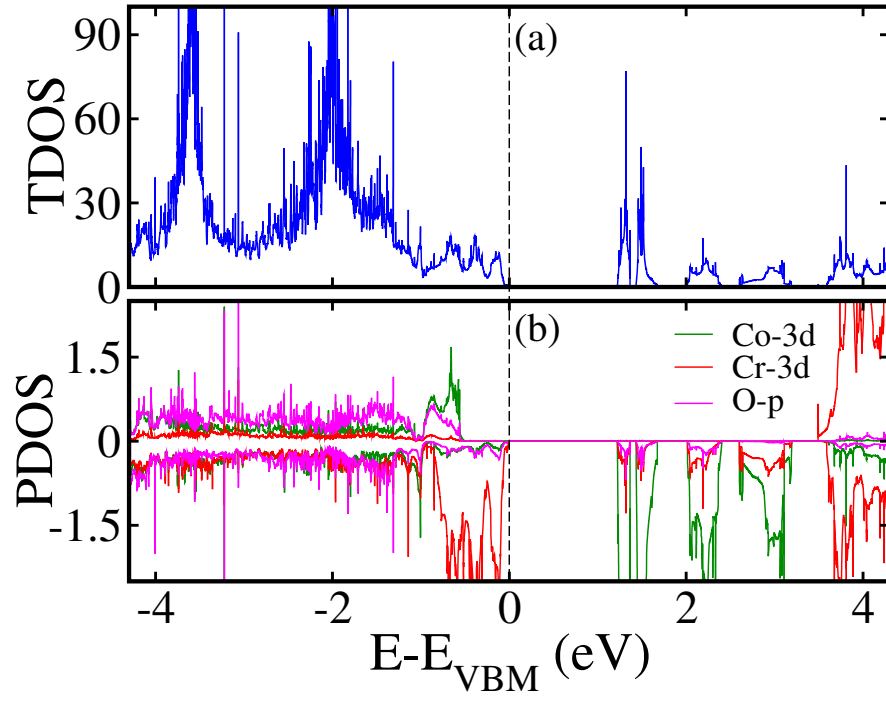

FIG. 1S: (Color line) GGA+ $U$ +SOC calculated (a) total density of states (TDOS) and (b) partial density of states (PDOS), highlighting the role of Co-3d/Cr-3d/O-2p orbitals around the Fermi level for the  $\text{Lu}_2\text{CoCrO}_6$  structure.
